# Supplementary material for: Liquid–liquid phase separation driven compartmentalization of reactive nucleoplasm
Source: PubMed Central journal article supplement (PMC8201646; doi:10.1088/1478-3975/abc5ad), 2021-01-07
Supplement: NIHMS1699554-supplement-Supplementary_Information.pdf [file NIHMS1699554-supplement-Supplementary_Information.pdf]

# Supporting Information for: "Liquid-liquid phase separation driven compartmentalization of reactive nucleoplasm."

Authors: Rabia Laghmach, Davit A. Potoyan

July 13, 2020

## 1 Supporting Information

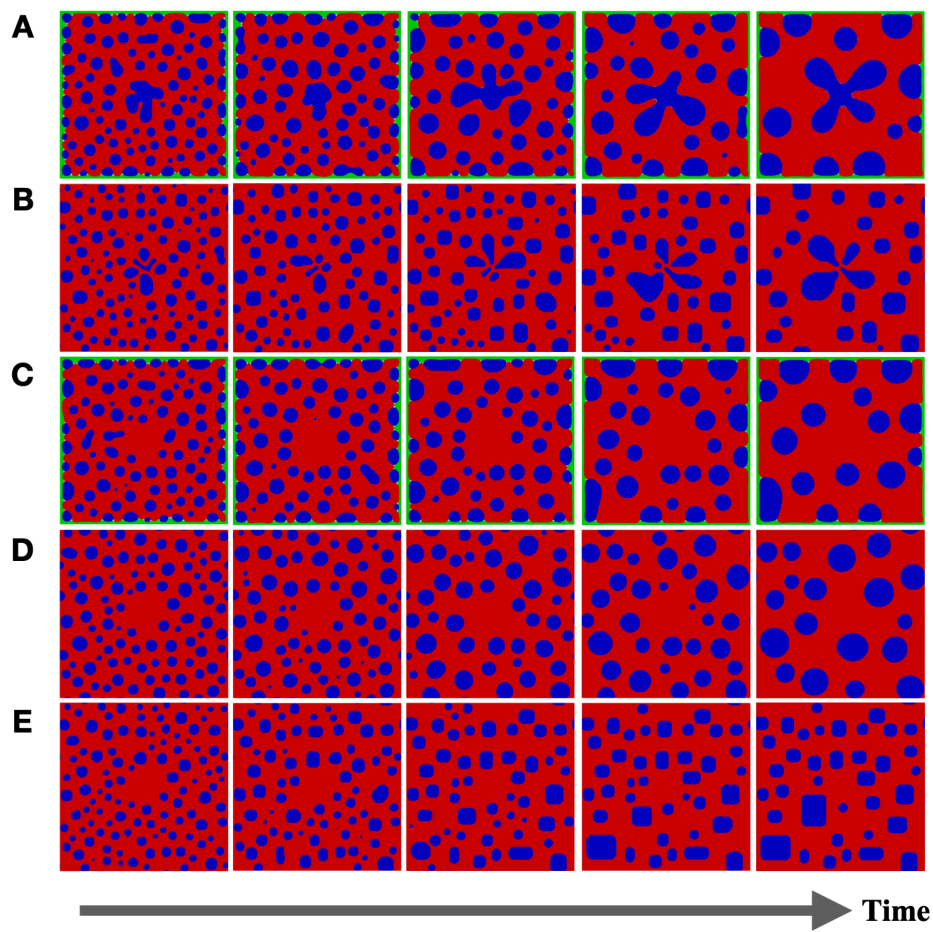

Figure 1: Evolution of phase-field variables  $\varphi_i$  for a **fast dynamical regime**  $\tau_d = \tau$ . From up to bottom: snapshots corresponding to simulation results with A)  $\tau_R = \tau_P = \tau$ ; B)  $\tau_P = 100\tau_R = 100\tau$ ; C)  $\tau_R = 10\tau_P = 10\tau$ ; D)  $\tau_R = \tau_P = 10\tau$ ; and E)  $\tau_P = 10\tau_R = 100\tau$ .

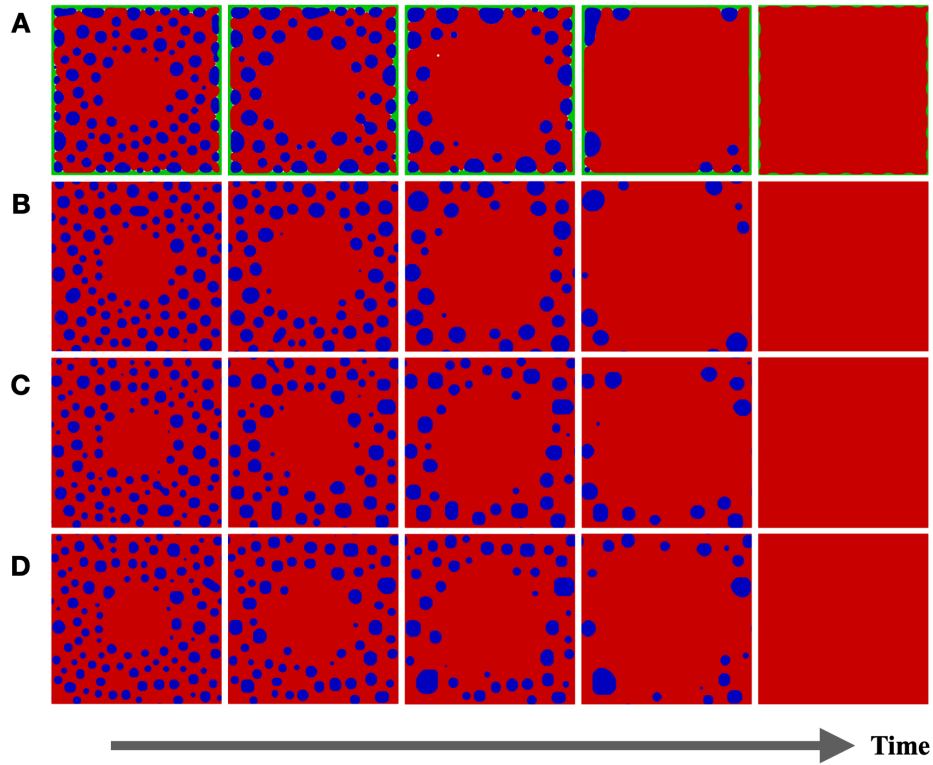

Figure 2: Evolution of phase-field variables  $\varphi_i$  for a **fast dynamical regime**  $\tau_d = \tau$  **with**  $\tau_R = 50\tau$ . From up to bottom: snapshots corresponding to simulation results with A)  $\tau_P = \tau$ ; B)  $\tau_P = 10\tau$ ; C)  $\tau_P = 50\tau$ ; and D)  $\tau_P = 100\tau$ .

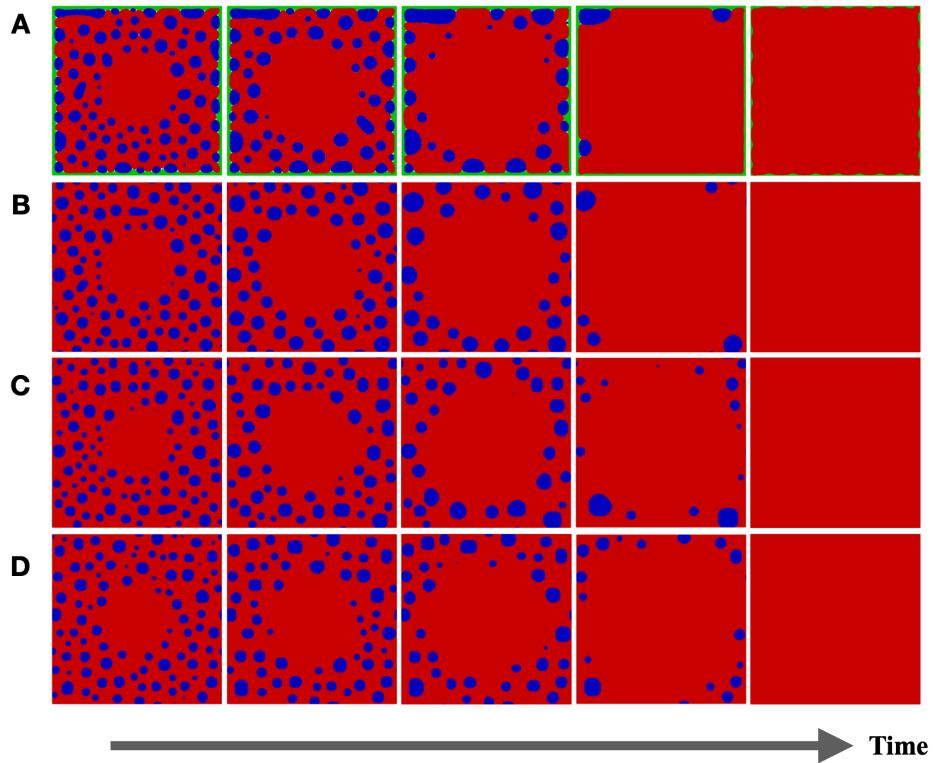

Figure 3: Evolution of phase-field variables  $\varphi_i$  for a **fast dynamical regime**  $\tau_d = \tau$  **with**  $\tau_R = 100\tau$ . From up to bottom: snapshots corresponding to simulation results with A)  $\tau_P = \tau$ ; B)  $\tau_P = 10\tau$ ; C)  $\tau_P = 50\tau$ ; and D)  $\tau_P = 100\tau$ .

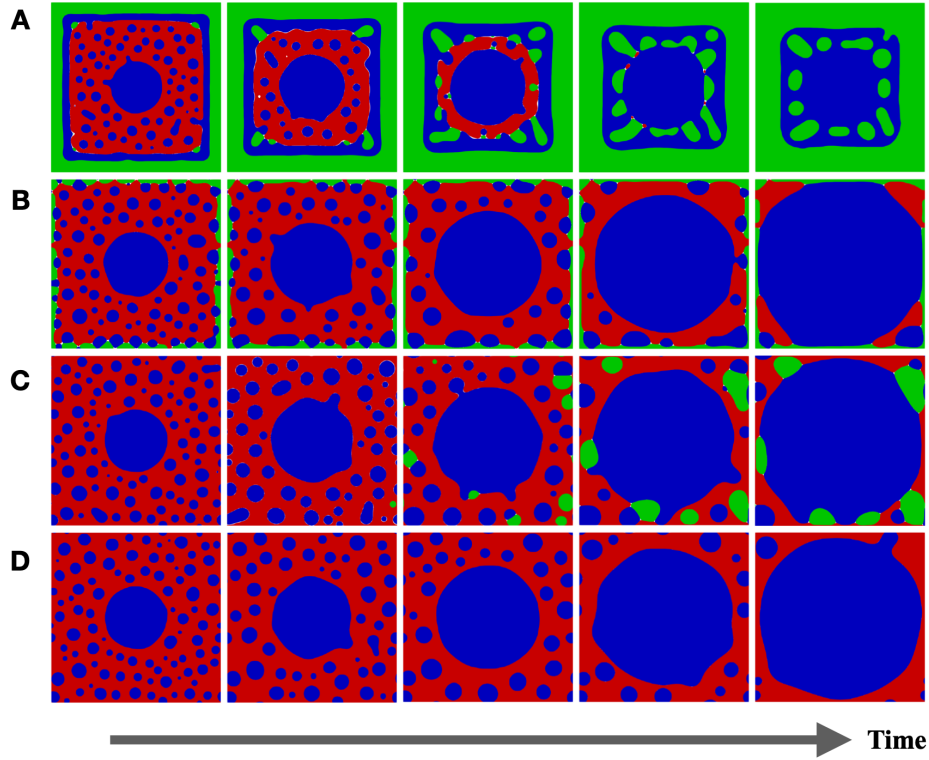

Figure 4: Evolution of phase-field variables  $\varphi_i$  for an intermediate dynamical regime  $\tau_d = 10\tau$  with  $\tau_R = \tau$ . From up to bottom: snapshots corresponding to simulation results with A)  $\tau_P = \tau$ ; B)  $\tau_P = 10\tau$ ; C)  $\tau_P = 50\tau$ ; and D)  $\tau_P = 100\tau$ .

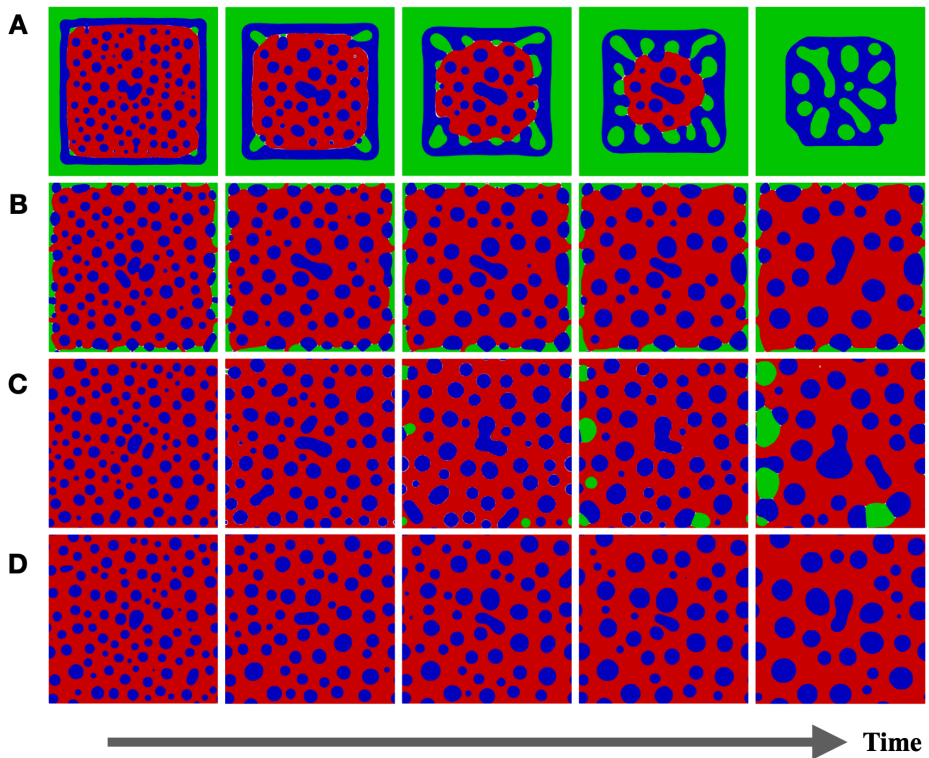

Figure 5: Evolution of phase-field variables  $\varphi_i$  for an intermediate dynamical regime  $\tau_d = 10\tau$  with  $\tau_R = 10\tau$ . From up to bottom: snapshots corresponding to simulation results with A)  $\tau_P = \tau$ ; B)  $\tau_P = 10\tau$ ; C)  $\tau_P = 50\tau$ ; and D)  $\tau_P = 100\tau$ .

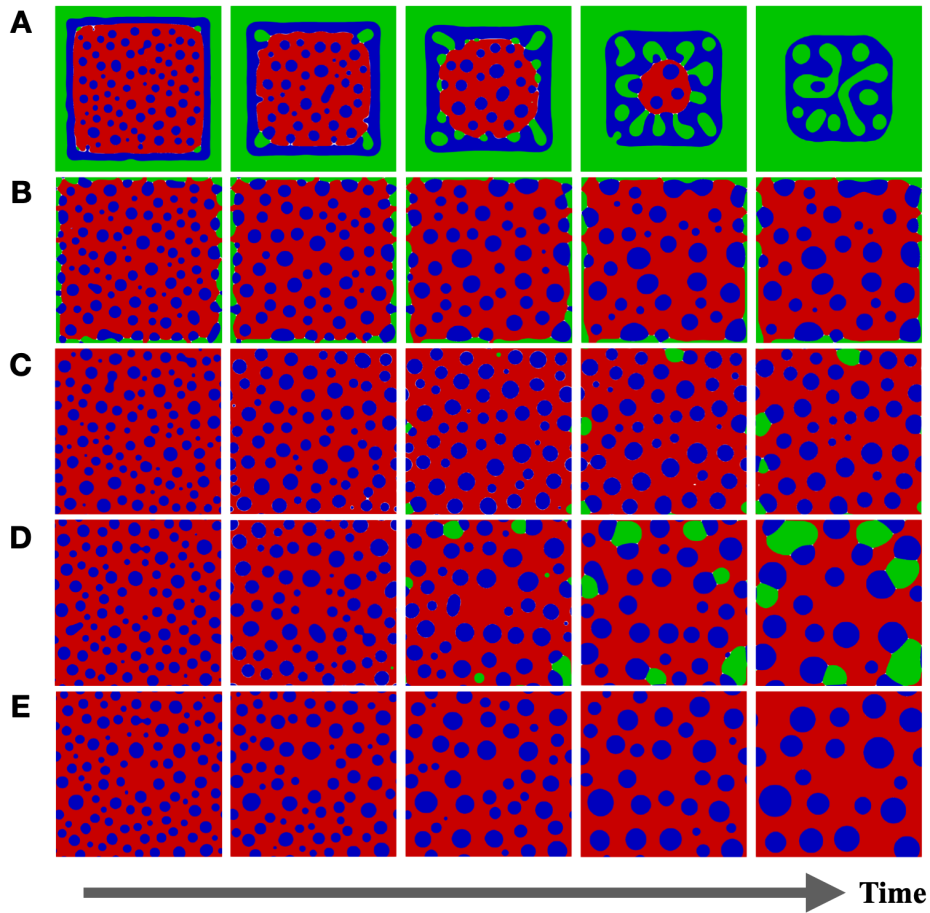

Figure 6: Evolution of phase-field variables  $\varphi_i$  for an **intermediate dynamical regime**  $\tau_d = 10\tau$ . From up to bottom: snapshots corresponding to simulation results with A)  $\tau_R = 50\tau_P = 50\tau$ ; B)  $\tau_R = 5\tau_P = 50\tau$ ; C)  $\tau_R = \tau_P = 50\tau$ ; D)  $\tau_R = 2\tau_P = 100\tau$ ; and E)  $\tau_R = \tau_P = 100\tau$ .

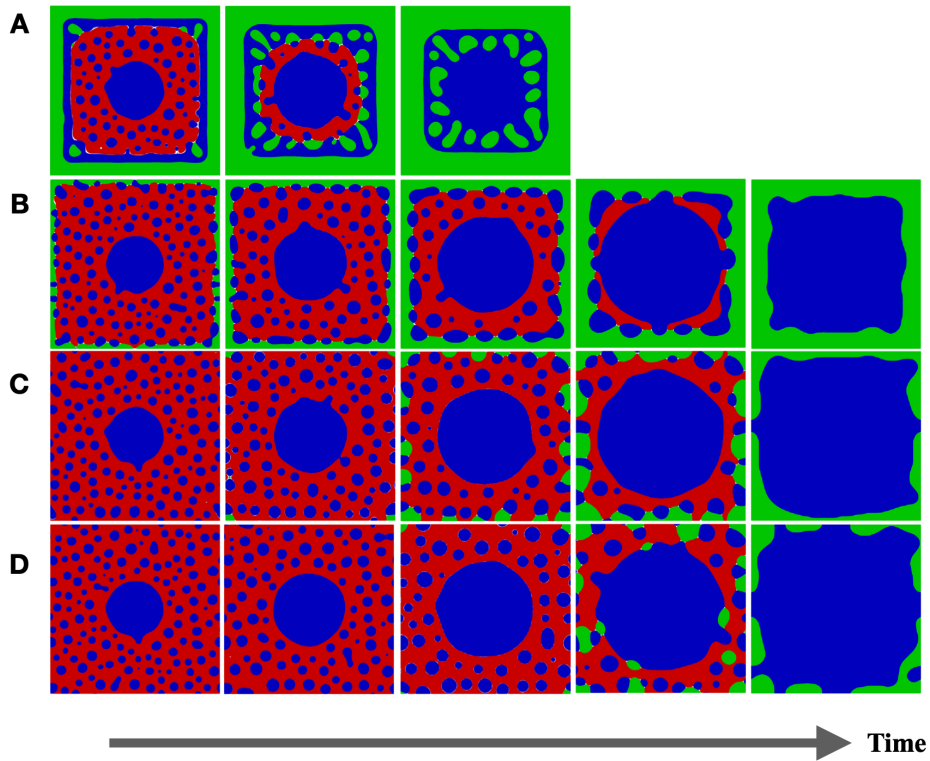

Figure 7: Evolution of phase-field variables  $\varphi_i$  for a **slow dynamical regime**  $\tau_d = 100\tau$  with  $\tau_R = \tau$ . From up to bottom: snapshots corresponding to simulation results with A)  $\tau_P = \tau$ ; B)  $\tau_P = 10\tau$ ; C)  $\tau_P = 50\tau$ ; and D)  $\tau_P = 100\tau$ .

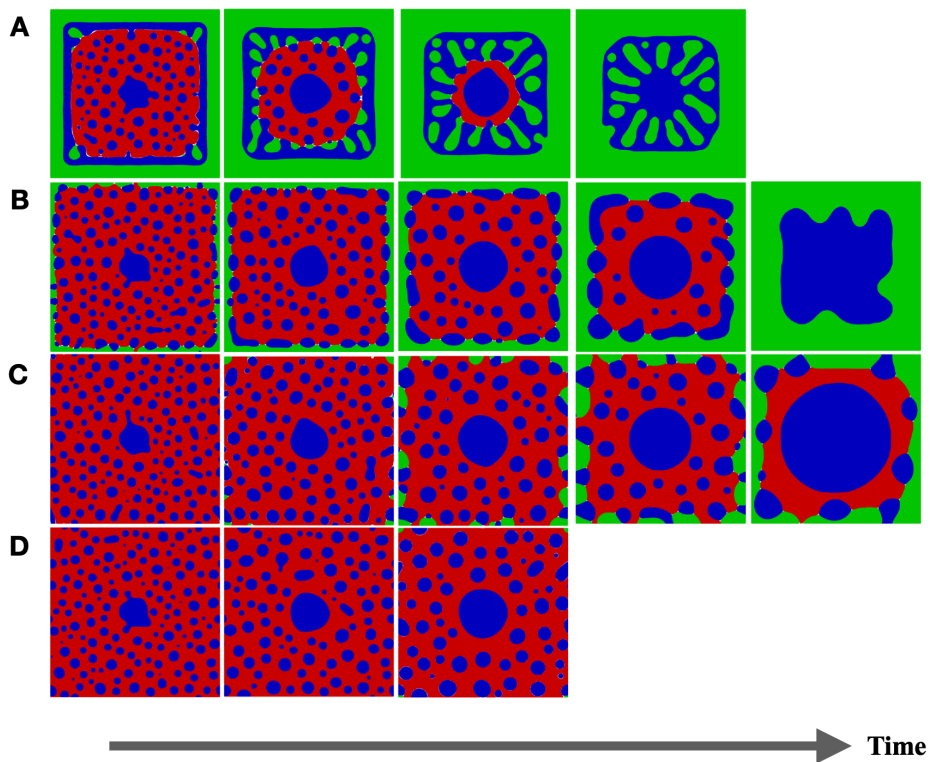

Figure 8: Evolution of phase-field variables  $\varphi_i$  for a **slow dynamical regime**  $\tau_d = 100\tau$  with  $\tau_R = 10\tau$ . From up to bottom: snapshots corresponding to simulation results with A)  $\tau_P = \tau$ ; B)  $\tau_P = 10\tau$ ; C)  $\tau_P = 50\tau$ ; and D)  $\tau_P = 100\tau$ .

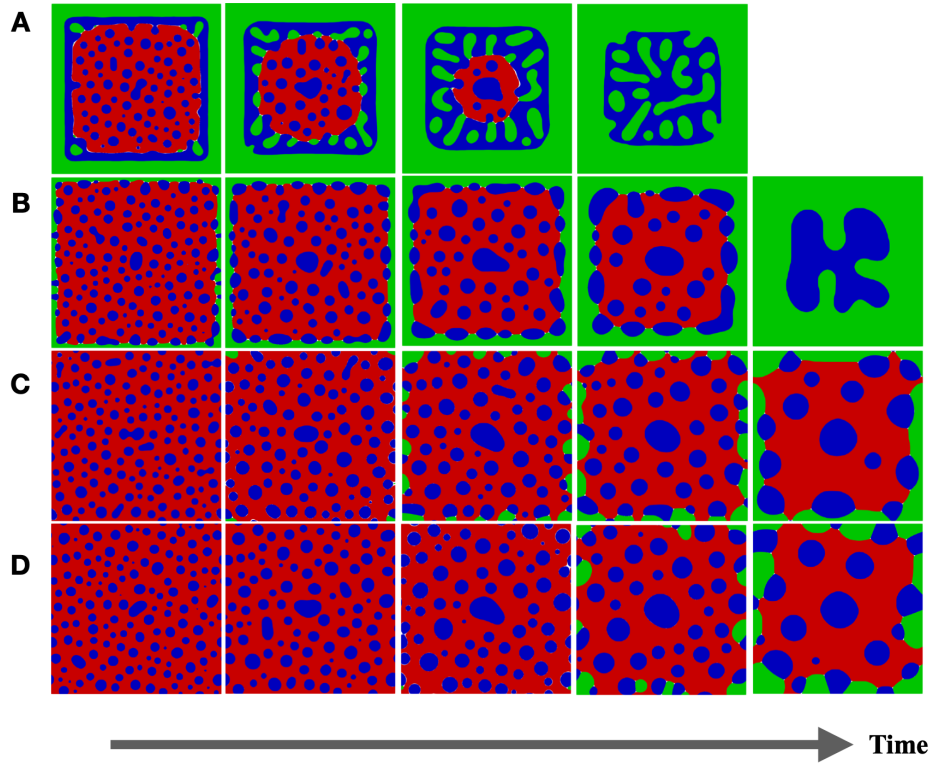

Figure 9: Evolution of phase-field variables  $\varphi_i$  for a **slow dynamical regime**  $\tau_d = 100\tau$  with  $\tau_R = 50\tau$ . From up to bottom: snapshots corresponding to simulation results with A)  $\tau_P = \tau$ ; B)  $\tau_P = 10\tau$ ; C)  $\tau_P = 50\tau$ ; and D)  $\tau_P = 100\tau$ .

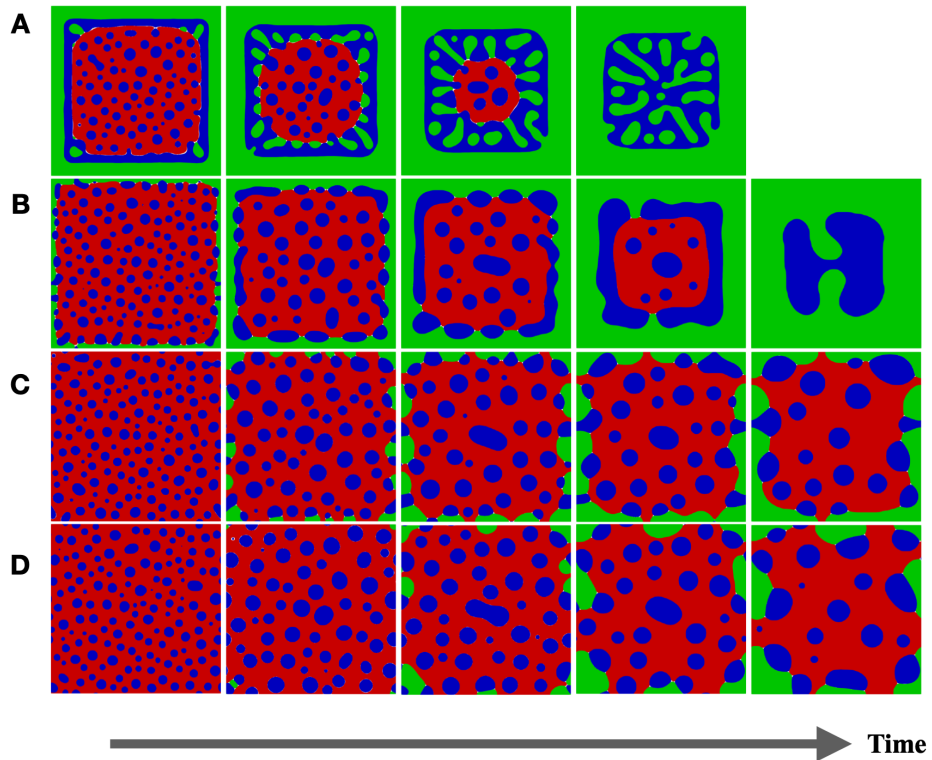

Figure 10: Evolution of phase-field variables  $\varphi_i$  for a **slow dynamical regime**  $\tau_d = 100\tau$  with  $\tau_R = 100\tau$ . From up to bottom: snapshots corresponding to simulation results with A)  $\tau_P = \tau$ ; B)  $\tau_P = 10\tau$ ; C)  $\tau_P = 50\tau$ ; and D)  $\tau_P = 100\tau$ .

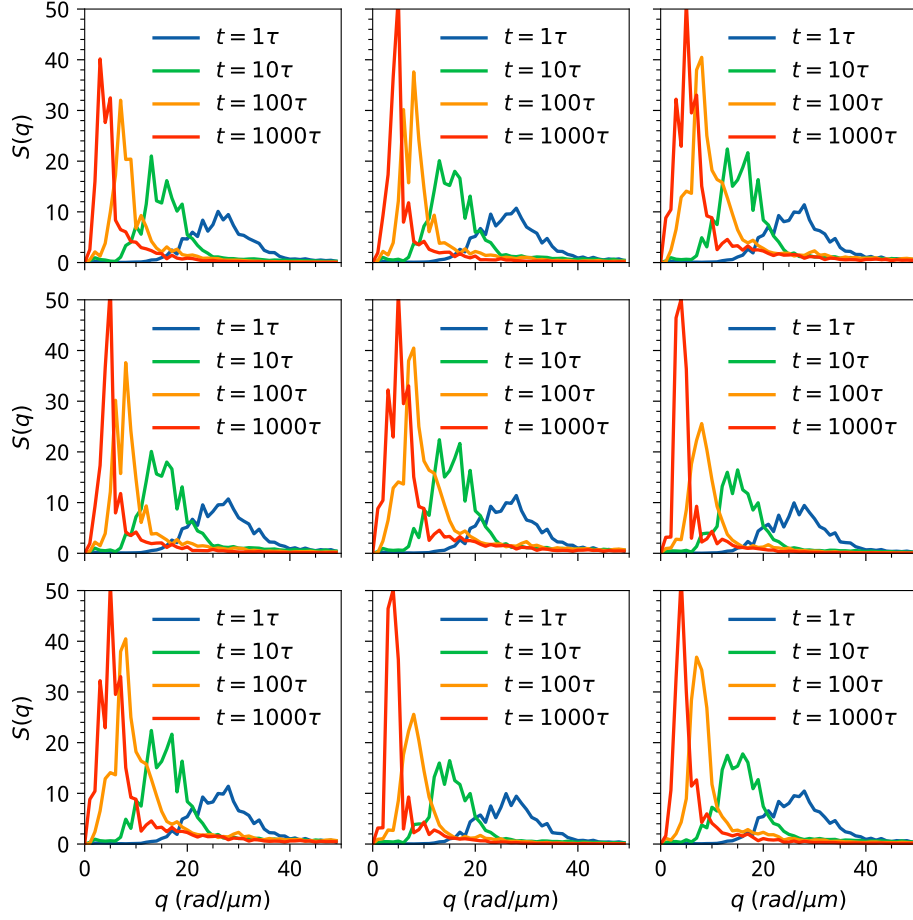

Figure 11: Structure factors for a fast dynamical regime  $\tau_d = \tau$ . Three panels corresponds to (A) Fixed transcription rate  $\tau_R = 1$ , varying translation from left to right:  $\tau_P = \{1, 10, 100\} \tau$  (B) Fixed transcription rate  $\tau_R = 10\tau$ , varying translation from left to right:  $\tau_P = \{1, 10, 100\} \tau$  (C) Fixed transcription rate  $\tau_R = 100\tau$ , varying translation from left to right:  $\tau_P = \{1, 10, 100\} \tau$ .

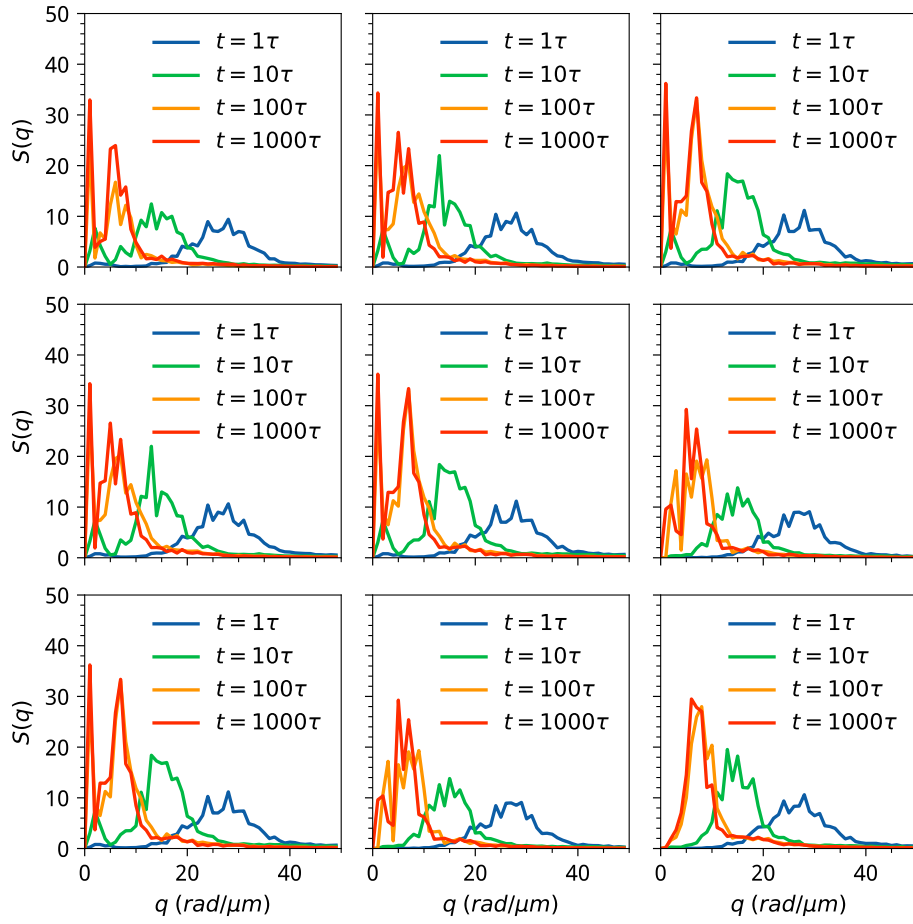

Figure 12: Structure factors for an intermediate dynamical regime  $\tau_d = 10\tau$ . Three panels corresponds to (A) Fixed transcription rate  $\tau_R = \tau$ , varying translation from left to right:  $\tau_P = \{1, 10, 100\} \tau$  (B) Fixed transcription rate  $\tau_R = 10\tau$ , varying translation from left to right:  $\tau_P = \{1, 10, 100\} \tau$  (C) Fixed transcription rate  $\tau_R = 100\tau$ , varying translation from left to right:  $\tau_P = \{1, 10, 100\} \tau$ .



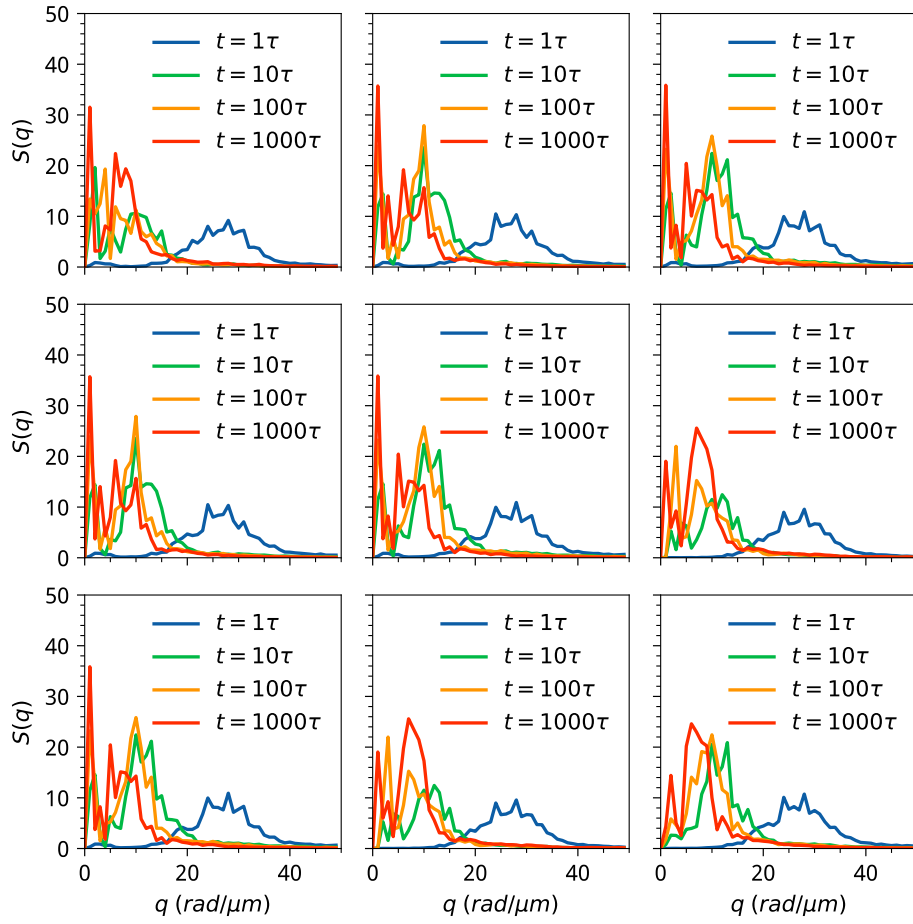

Figure 13: Structure factors for a slow dynamical regime  $\tau_d = 100\tau$ . Three panels corresponds to (A) Fixed transcription rate  $\tau_R = \tau$ , varying translation from left to right:  $\tau_P = \{1, 10, 100\} \tau$  (B) Fixed transcription rate  $\tau_R = 10\tau$ , varying translation from left to right:  $\tau_P = \{1, 10, 100\} \tau$  (C) Fixed transcription rate  $\tau_R = 100\tau$ , varying translation from left to right:  $\tau_P = \{1, 10, 100\} \tau$ .

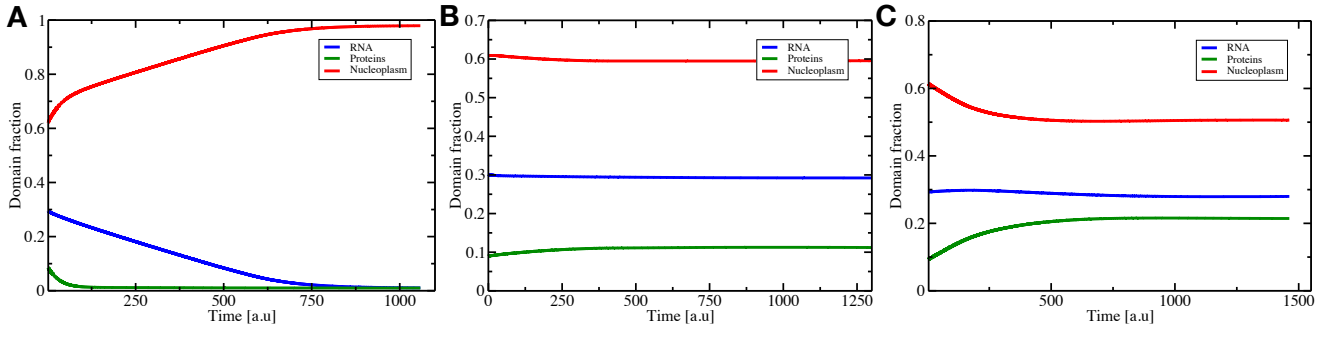

Figure 14: Temporal evolution of the average concentration of the three species  $\langle \varphi_i \rangle$  at different kinetic regimes with  $\tau_R = \tau_P = 100\tau$ : A) fast dynamical regime  $\tau_d = \tau$ ; B) an intermediate dynamical regime  $\tau_d = 10\tau$ ; C) slow dynamical regime  $\tau_d = 100\tau$ .
